# Supplementary material
Source: publisher site journal article supplement (https://www.dovepress.com/get_supplementary_file.php?f=473908.docx)
Supplement: Supplementary file 1 [file get_supplementary_file.php]

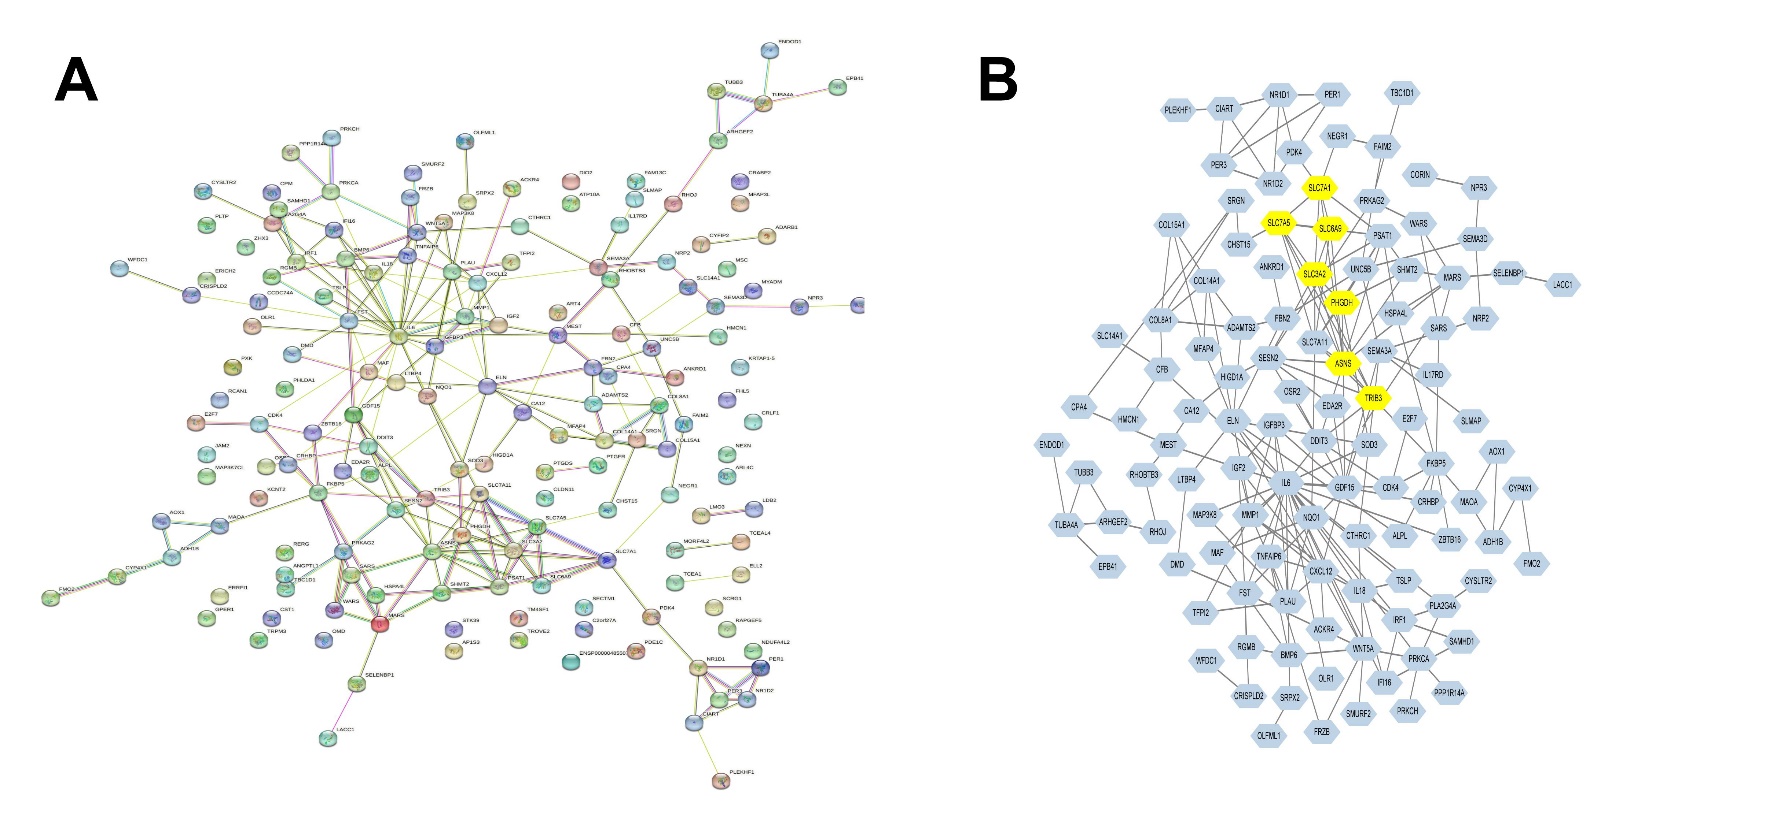


**Supplementary Figure 1.** **The protein-protein interaction (PPI) network and hub gene analysis of DEGs.** **(A)** The PPI network of DEGs. **(B)** Hub genes in the PPI network.


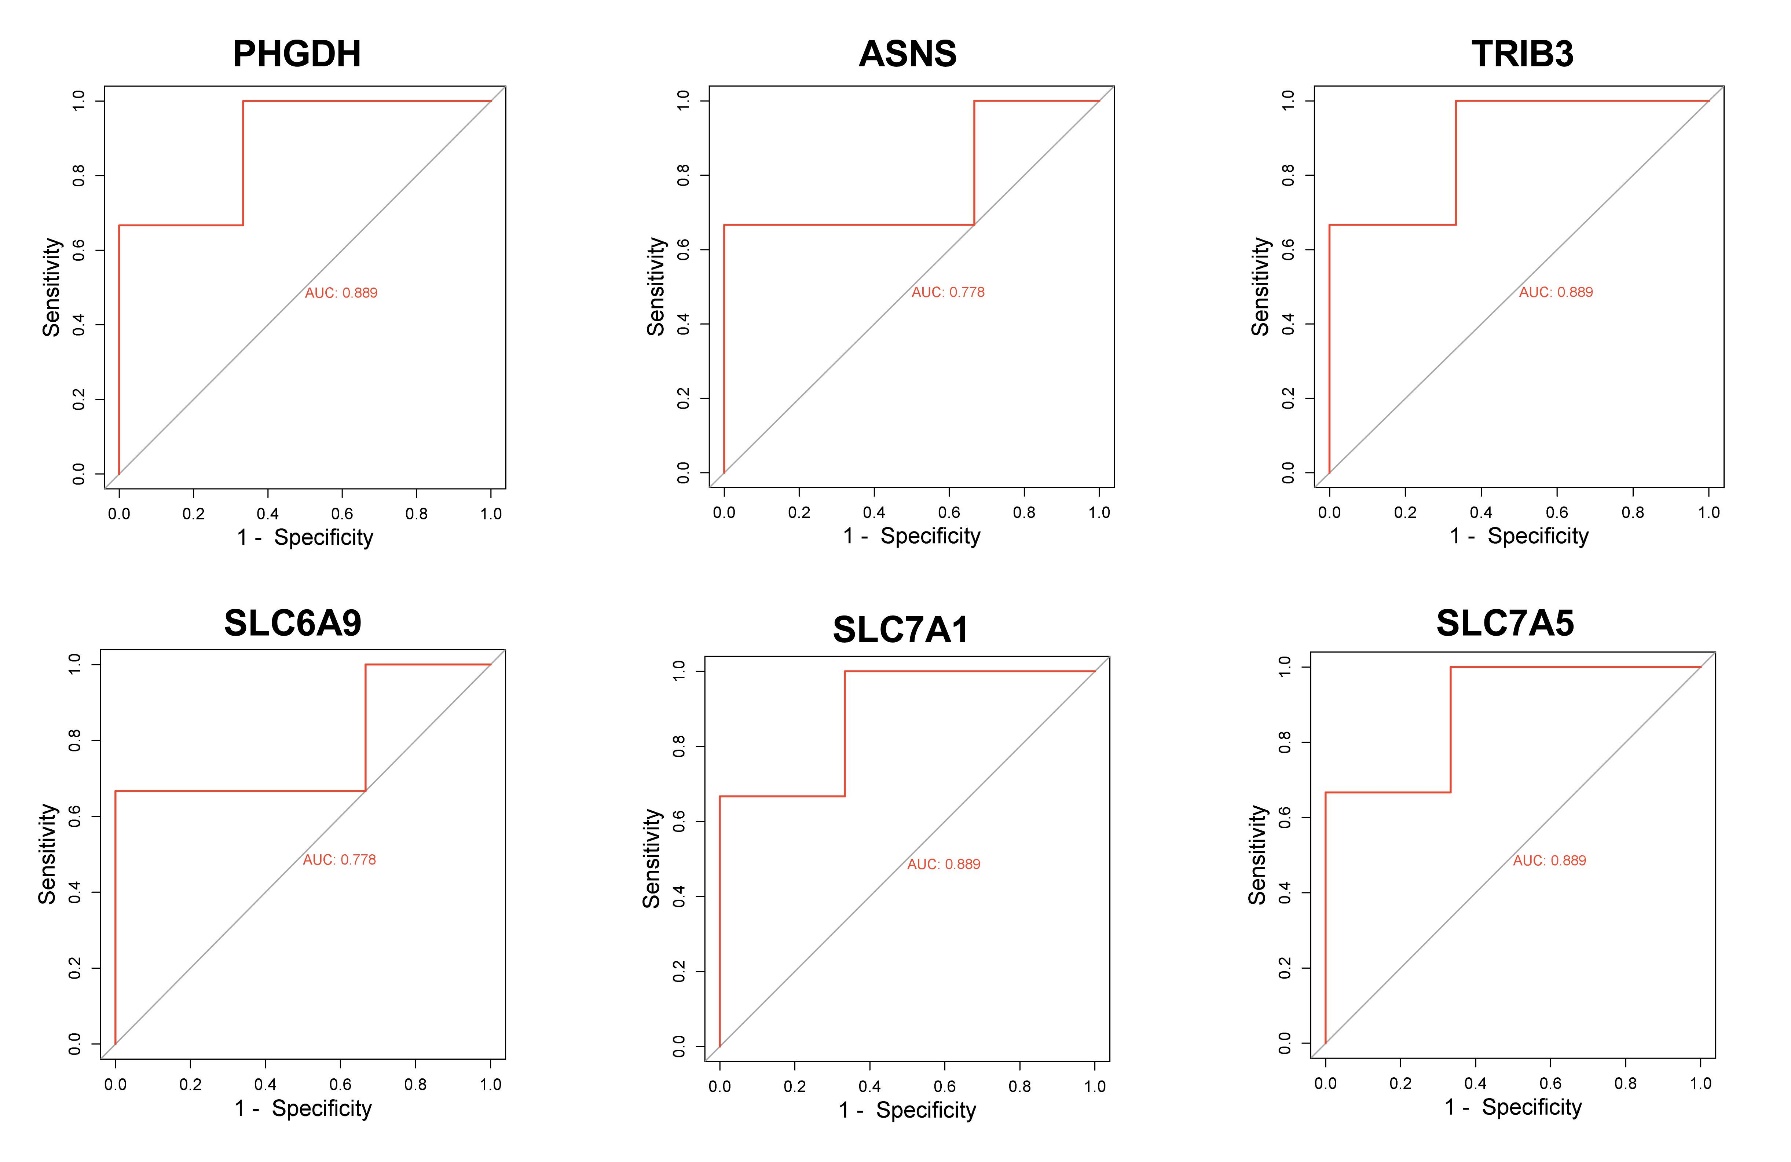


**Supplementary Figure2. The receiver operating characteristic curves.**

**Supplementary Table 1. The sequences of primers used for RT-qPCR**

| Primers | Sequences (5’-3’) |
| --- | --- |
| GAPDH-F | GAGTCAACGGATTTGGTCGT |
| GAPDH-R | TTGATTTTGGAGGGATCTCG |
| PHGDH-F | CTCACCAGTGCCTTCTCTCC |
| PHGDH-R | TCTCTCAGAAGGCCGACAAT |
| SLC6A9-F | TCAGGAACCCTGGATCTGAC |
| SLC6A9-R | AAGCCCAGGATGGAGAAGAT |
| ASNS-F | CTGAAGCATCGAGAGGGAAC |
| ASNS-R | AATGCAAACACACCATCCAA |
| TRIB3-F | ACTTGGCTGTGGGATTCAAG |
| TRIB3-R | CTGTGGGCCTGGGTACTAAA |
| SLC7A5-F | GCCCTGTCATTCCTGTTTGT |
| SLC7A5-R | CTATCTCAGGTGGCACAGCA |
| SLC7A1-F | GGGTTTATGCCCTTTGGATT |
| SLC7A1-R | TAAGGCATCATGAGCGTGAG |

**Supplementary Table 2. The top 15 up-regulated DEGs and down-regulated DEGs**

| Name | Description | log2FoldChange | pval | up/down |
| --- | --- | --- | --- | --- |
| OMD | osteomodulin | 6.29 | 1.10E-08 | up |
| FKBP5 | FK506 binding protein 5 | 4.40 | 1.34E-06 | up |
| CPM | carboxypeptidase M | 4.32 | 6.20E-06 | up |
| CORIN | corin, serine peptidase | 3.71 | 3.50E-02 | up |
| FRZB | frizzled-related protein | 3.65 | 2.62E-03 | up |
| LMO3 | LIM domain only 3 (rhombotin-like 2) | 3.50 | 2.73E-03 | up |
| SRGN | Memczak2013 ANTISENSE, coding, INTERNAL, UTR3 best transcript NM_002727 | 3.28 | 5.69E-03 | up |
| SAMHD1 | SAM domain and HD domain 1 | 3.23 | 8.88E-06 | up |
| MAOA | monoamine oxidase A | 3.22 | 3.54E-04 | up |
| ART4 | ADP-ribosyltransferase 4 (Dombrock blood group) | 3.18 | 4.87E-05 | up |
| OLR1 | oxidized low density lipoprotein (lectin-like) receptor 1 | 3.16 | 8.46E-03 | up |
| LINC01088 | long intergenic non-protein coding RNA 1088 | 3.04 | 1.91E-03 | up |
| CTHRC1 | collagen triple helix repeat containing 1 | 2.82 | 1.87E-02 | up |
| ANGPTL1 | angiopoietin like 1 | 2.81 | 1.02E-03 | up |
| PLCE1-AS1 | PLCE1 antisense RNA 1 | 2.78 | 5.90E-03 | up |
| CA12 | carbonic anhydrase XII | -3.02 | 5.01E-05 | down |
| LACC1 | laccase (multicopper oxidoreductase) domain containing 1 | -3.03 | 4.06E-05 | down |
| CLDN11 | claudin 11 | -3.03 | 1.51E-03 | down |
| FAIM2 | Fas apoptotic inhibitory molecule 2 | -3.05 | 1.31E-02 | down |
| ARL4C | ADP-ribosylation factor like GTPase 4C | -3.15 | 8.18E-05 | down |
| LDB2 | LIM domain binding 2 | -3.17 | 2.39E-03 | down |
| ACKR4 | atypical chemokine receptor 4 | -3.43 | 8.10E-04 | down |
| SLC7A11 | solute carrier family 7 (anionic amino acid transporter light chain, xc- system), member 11 | -3.49 | 1.32E-03 | down |
| SLC14A1 | solute carrier family 14 (urea transporter), member 1 (Kidd blood group) | -3.57 | 4.80E-04 | down |
| CRHBP | corticotropin releasing hormone binding protein | -3.57 | 4.29E-02 | down |
| PHGDH | phosphoglycerate dehydrogenase | -3.63 | 1.61E-02 | down |
| NDUFA4L2 | NADH dehydrogenase (ubiquinone) 1 alpha subcomplex, 4-like 2 | -3.67 | 5.41E-07 | down |
| PSAT1 | phosphoserine aminotransferase 1 | -3.68 | 4.33E-03 | down |
| FST | follistatin | -4.10 | 1.37E-04 | down |
| MEST | mesoderm specific transcript | -4.11 | 1.55E-03 | down |
